# Supplementary material for: All-fiber structure covered with two-dimensional conductive MOF materials to construct a comfortable, breathable and high-quality self-powered wearable sensor system
Source: Royal Society of Chemistry journal article supplement (doi:10.1039/d1ta08453d), 2021-12-10
Supplement: d1ta08453d1.pdf [file d1ta08453d1.pdf]

# Supporting Information

**The all-fiber structure covered with two-dimensional conductive MOF materials to construct a comfortable, breathable and high-quality self-powered wearable sensor system**

Youwei Zhao,<sup>a, b</sup> Ningle Hou,<sup>b</sup> Yifan Wang,<sup>a</sup> Chaochao Fu,<sup>\*b</sup> Xiaoting Li,<sup>\*b</sup> Ling Li,<sup>\*a</sup>  
Wenming Zhang<sup>\*a</sup>

<sup>a</sup> *National-Local Joint Engineering Laboratory of New Energy Photoelectric Devices, College of Physics Science and Technology, Hebei University, Baoding 071002, China.*

<sup>b</sup> *National & Local Joint Engineering Research Center of Metrology Instrument and system, College of Quality and Technical Supervision, Hebei University, Baoding 071002, China.*

**Figure S1** (a)The photo of individual sensor unit and (b)the physical picture of super capacitor. (c)The size of screen-printed electrodes. (d-e) The pictures of the electrode of the flexible sensor before and after working 5000 times under a pressure of 60kPa.

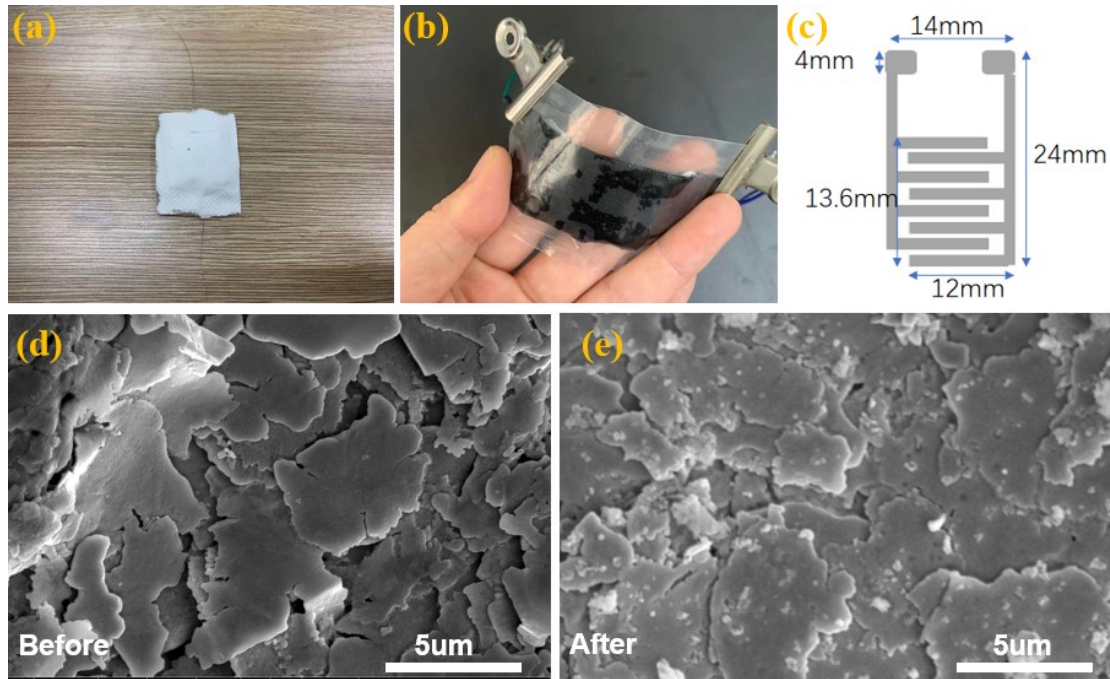

**Figure S2** (a) PU fiber with a smooth surface, (b) Optical photo of hand pressure plastic film sealing machine, (c) Flexible sensor array, (d) Flexible sensor array with high breathability. (e-f) Iodine vapor experiment verifies the gas tolerance of the sensor. (g-h) Tolerance test of packaged sensor to large droplets (Before and after the droplets fall for 2h).

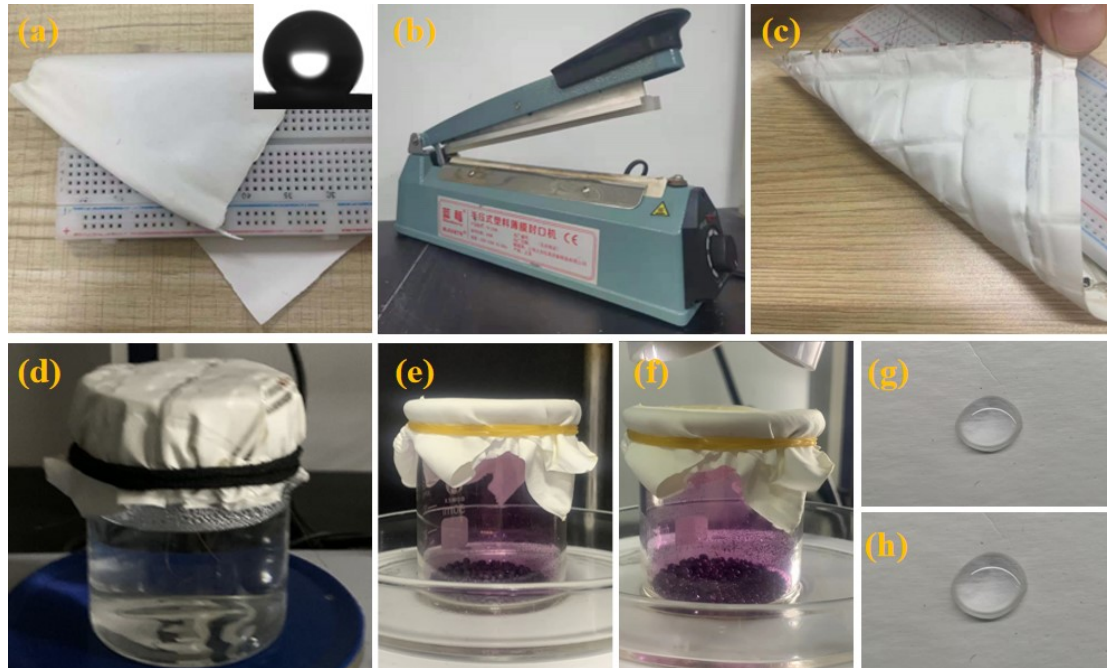

**Figure S3** (a) The effect of the CNFNs on the sensitivity, (b) The effect of the Cu-CAT@CNFNs(3h) on the sensitivity, (c) The effect of the Cu-CAT@CNFNs(8h) on the sensitivity.

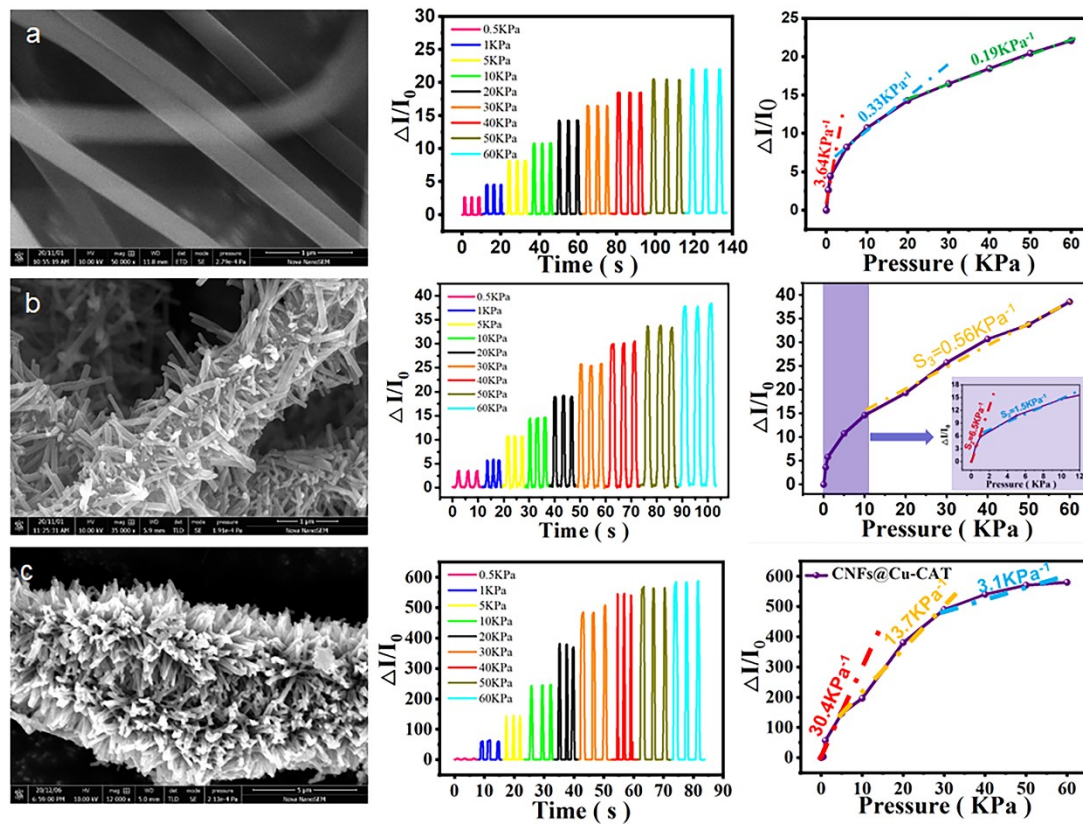

**Figure. S4** The excellent sensitivity and stability pressure sensor system

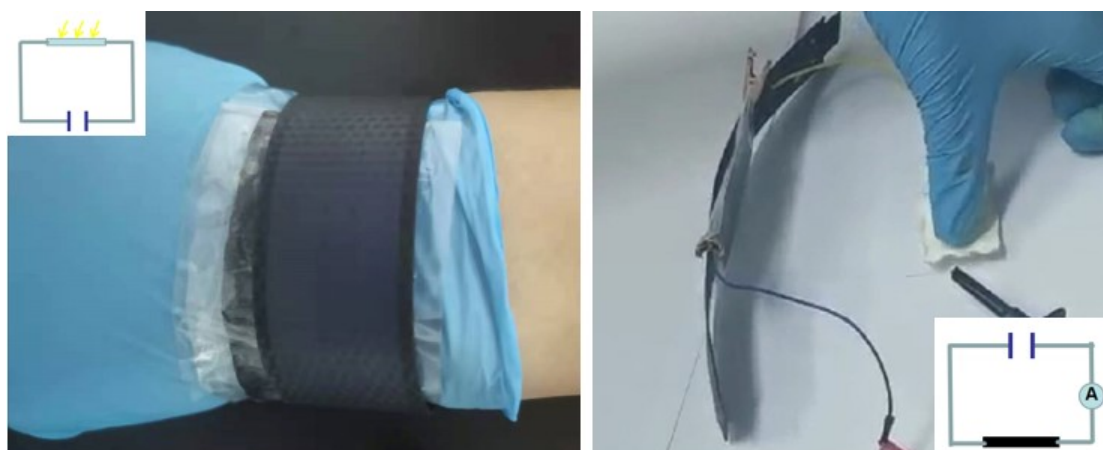

**Figure S5** (a) The SEM of pure Cu-CAT. (b) The TEM image of Cu-CAT@CNFNs, the mapping of the nanofiber confirmed the uniform distribution of C, N and Cu in the Cu-CAT@CNFNs nanolayer. (d) the EDS of the Cu-CAT@CNFNs.

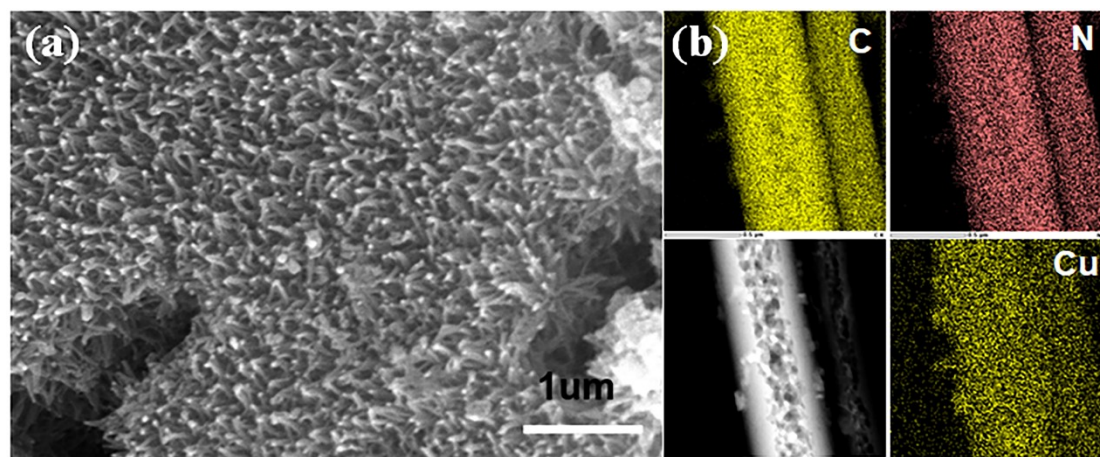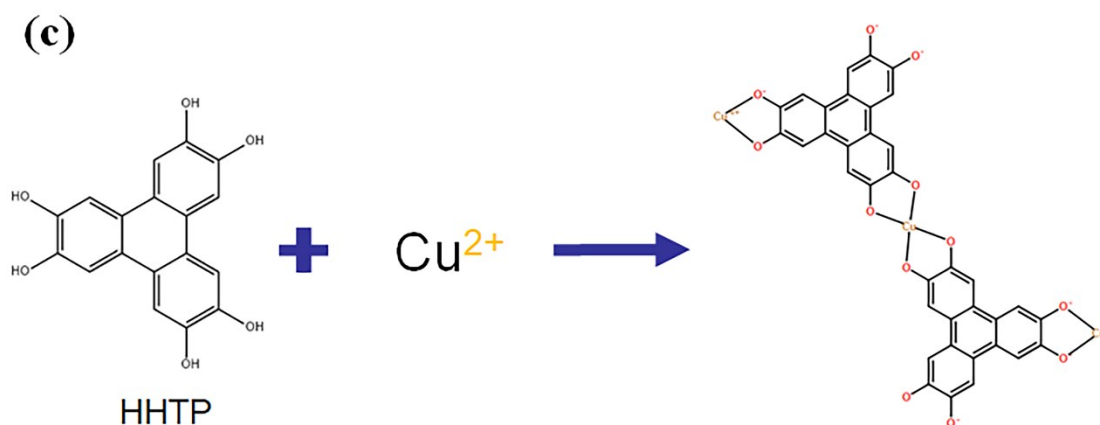

(d) the EDS of the Cu-CAT@CNFNs

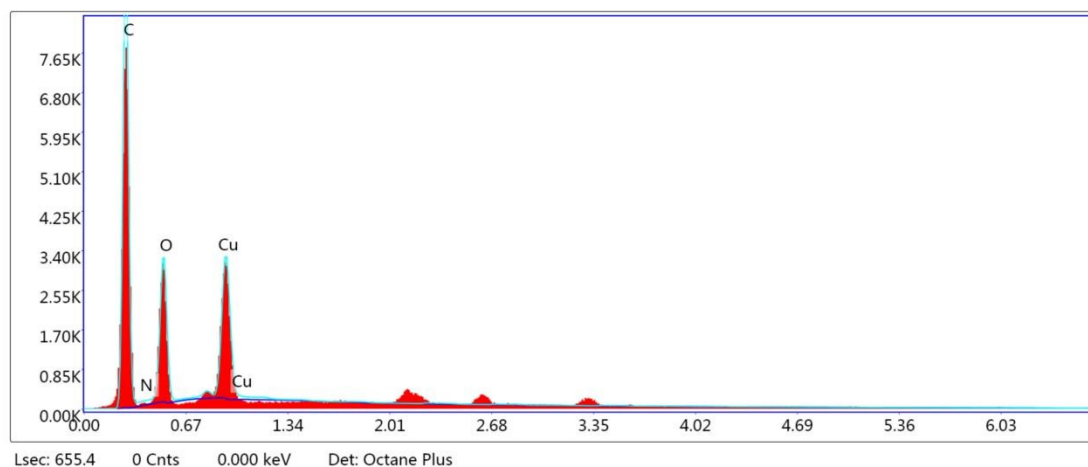

**Figure S6** the stress-strain curve of the pressure sensor.

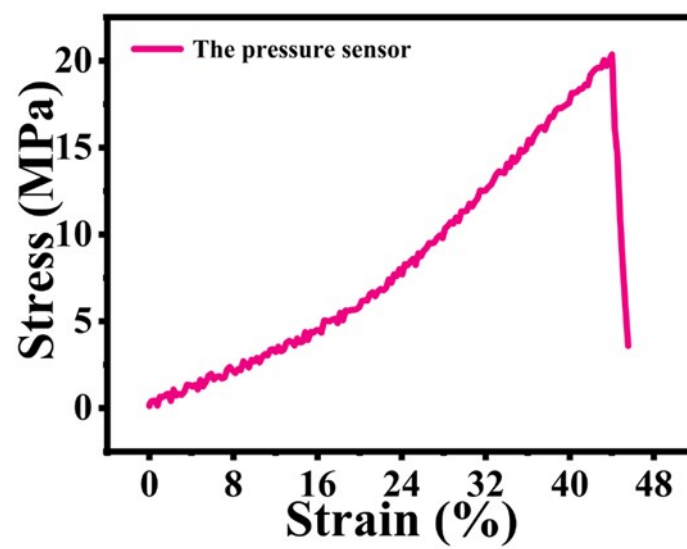

**Figure S7** Analyze the working principle of the sensor from the microstructure.

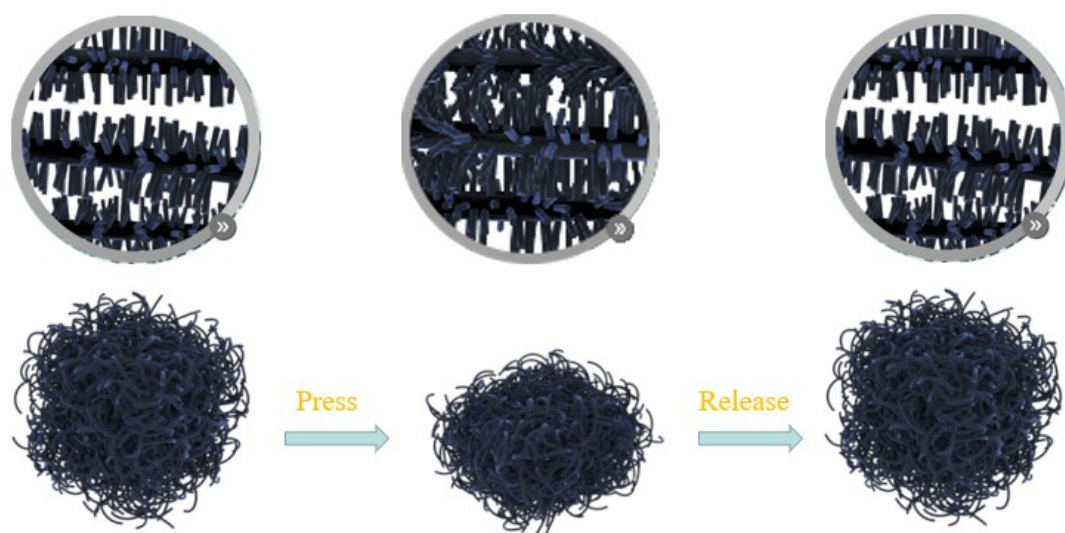

**Figure S8** (a-c) CVs of carbon cloth, Cu-CAT-NWAs/CC-4h, Cu-CAT-NWAs/CC-12h white at different sweep speeds. (d) EIS of pure carbon cloth. (e-f) Galvanostatic charge and discharge curves at different current densities. (g-i) SEM images of the pure CC, Cu-CAT-NWAs/CC-4h, Cu-CAT-NWAs/CC-12h.

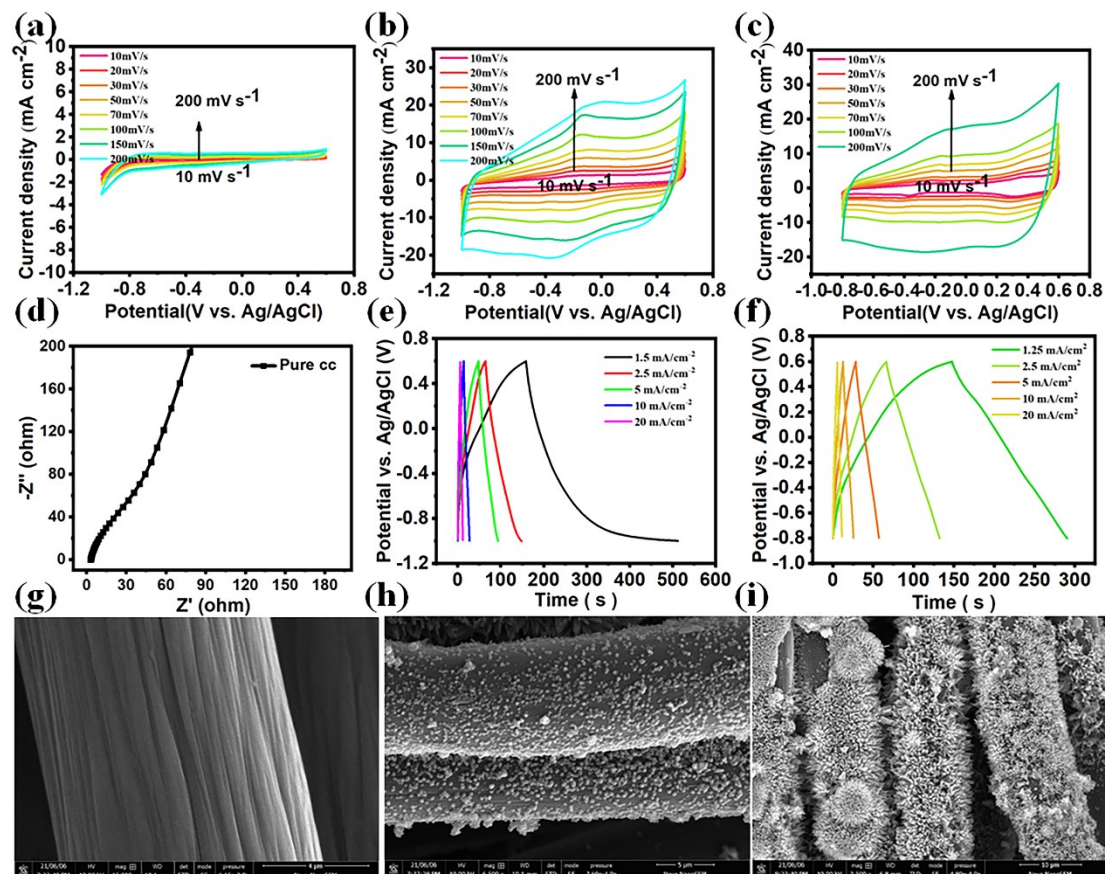

**Figure. S9**

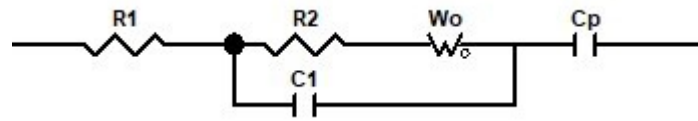

$R_1$  is the equivalent ohmic resistance, including resistance of the electrolyte and the internal resistance of the electrode.  $R_2$  is charge transfer resistance,  $W_o$  is the finite-length Warburg diffusion element,  $C_1$  is electrical double-layer capacitance, and  $C_p$  is the pseudocapacitance.

**Figure S10** The detailed distribution of the interdigital electrodes and the sensor array

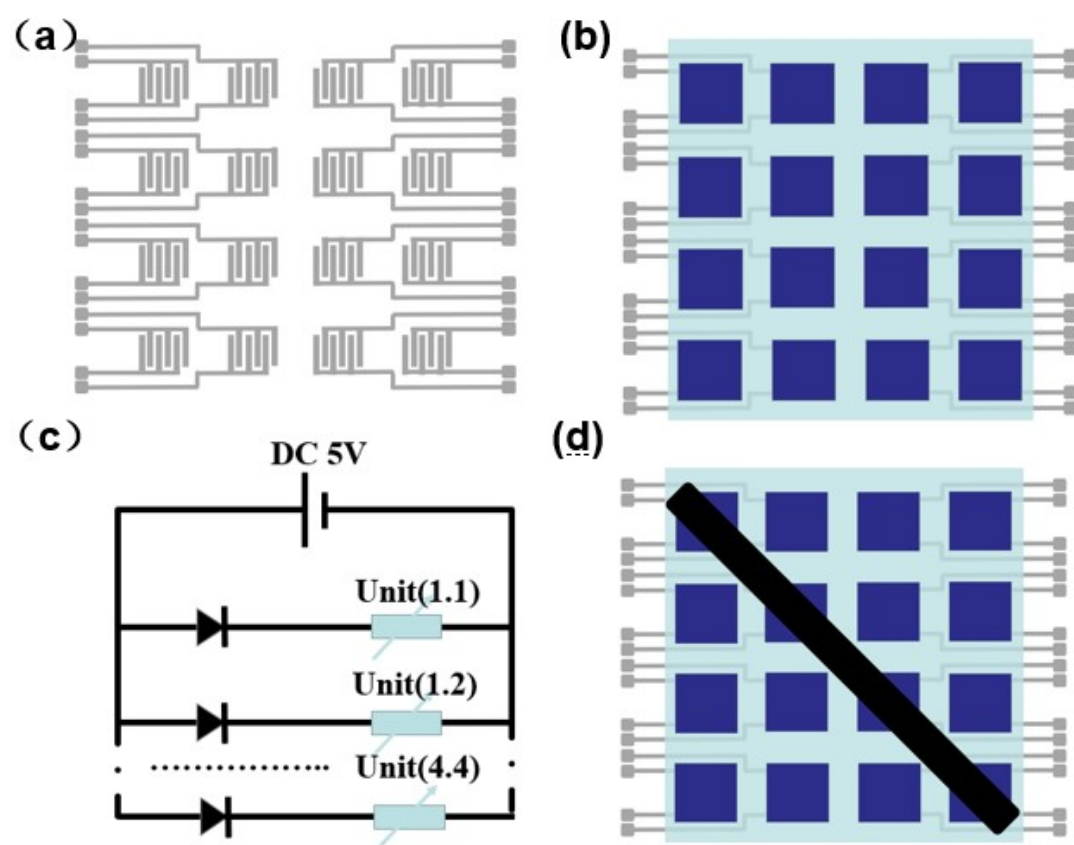

**Table S1** The physical parameters of pressure sensor

| Thickness of PU | Thickness of<br>CNFNs@Cu-CAT | Thickness of<br>Silver electrode | Weight of<br>Flexible pressure<br>sensor<br>(Per cm <sup>-2</sup> ) |
|-----------------|------------------------------|----------------------------------|---------------------------------------------------------------------|
| 0.13 mm         | 0.50 cm                      | 5.00 μm                          | 0.28 g                                                              |

**Table S2** The physical parameters of supercapacitor

| Thickness of<br>CC@Cu-CAT | Thickness of<br>PVA/KCl | Thickness of<br>Supercapacitor | Weight<br>Supercapacitor<br>(Per cm <sup>-2</sup> ) | of |
|---------------------------|-------------------------|--------------------------------|-----------------------------------------------------|----|
| 0.2160mm                  | 3.00mm                  | 3.50mm                         | 0.42g                                               |    |

**Table S3** The physical parameters of solar panels

| Operating<br>Voltage | Working<br>current | Short<br>circuit<br>current | Length | Width | Thickness | Weight       |
|----------------------|--------------------|-----------------------------|--------|-------|-----------|--------------|
| 2V                   | 0-200mA            | 220mA                       | 200mm  | 30mm  | 0.5mm     | About<br>10g |

**Table S4**

| Sensing Material                                                                     | Range of Detection (Pa) | Sensitivity (Kpa <sup>-1</sup> ) | cycles                                            | Breathability Softness |
|--------------------------------------------------------------------------------------|-------------------------|----------------------------------|---------------------------------------------------|------------------------|
| Polydimethylsiloxane (PDMS)/carbon nanofiber (CNF) <sup>1</sup>                      | 35 to 690 kPa           | factors of 18.3 and 6.3          | 1000                                              | No/Yes                 |
| 3D carbon nanofiber networks (CNFNs) <sup>2</sup>                                    | 0–0.25 kPa              | 1.41 kPa <sup>-1</sup>           | 0.38 kPa for 5000                                 | No/Yes                 |
| Copper 7,7,8,8-tetracyanoquinodimethane (CuTCNQ) <sup>3</sup>                        | 0-1.5KPa                | 6.25 kPa <sup>-1</sup>           | 500 Pa for 10000                                  | No/Yes                 |
| MXene/cotton fabric (MCF) <sup>4</sup>                                               | 0-1.30 kPa              | 5.30 kPa <sup>-1</sup>           | ----                                              | Yes/Yes                |
| All paper-based <sup>5</sup>                                                         | 0.03-30.2 kPa           | 1.5 kPa <sup>-1</sup>            | ----                                              | Yes/Yes                |
| Cotton cellulose-incorporated multi-walled carbon nanotubes (MWCNTs) <sup>6</sup>    | 0 - 20 kPa              | 0.0197 kPa <sup>-1</sup>         | 100 cyclic compressive tests ( $\epsilon=70\%$ ). | Yes/Yes                |
| Nano Carbon Black-Based <sup>7</sup>                                                 | 0–15 kPa                | 31.63 kPa <sup>-1</sup>          | 15 kPa for 1500                                   | No/Yes                 |
| 3D carbon aerogels <sup>8</sup>                                                      | 50Pa-10kPa              | 114.6kPa <sup>-1</sup>           | 10 000 cycles, at 50% strain                      | No/Yes                 |
| blending carbon black (CB) with polydimethylsiloxane (PDMS) and Ecoflex <sup>9</sup> | ----                    | ----                             | 3000 bending cycles at a strain of about 5%       | No/Yes                 |
| thermoplastic polyurethane/carbon nanofibers <sup>10</sup>                           | 0–60 kPa                | 0.14 kPa <sup>-1</sup>           | 20 kPa for 120000                                 | Yes/Yes                |
| This work                                                                            | 0-60kPa                 | 30.10 kPa <sup>-1</sup>          | 5000                                              | Yes/Yes                |

1. S. A. Chowdhury, M. C. Saha, S. Patterson, T. Robison and Y. Liu, *Advanced Materials Technologies*, 2019, **4**, 1800398.
2. Z. Han, Z. Cheng, Y. Chen, B. Li, Z. Liang, H. Li, Y. Ma and X. Feng, *Nanoscale*, 2019, **11**, 5942-5950.
3. X. Fu, H. Dong, Y. Zhen and W. Hu, *Small*, 2015, **11**, 3351-3356.
4. Y. Zheng, R. Yin, Y. Zhao, H. Liu, D. Zhang, X. Shi, B. Zhang, C. Liu and C. Shen, *Chemical Engineering Journal*, 2021, **420**, 127720.
5. L. Gao, C. Zhu, L. Li, C. Zhang, J. Liu, H. D. Yu and W. Huang, *ACS Appl Mater Interfaces*, 2019, **11**, 25034-25042.
6. L. Zhao, F. Qiang, S. W. Dai, S. C. Shen, Y. Z. Huang, N. J. Huang, G. D. Zhang, L. Z. Guan, J. F. Gao, Y. H. Song and L. C. Tang, *Nanoscale*, 2019, **11**, 10229-10238.
7. J. Hu, J. Yu, Y. Li, X. Liao, X. Yan and L. Li, *Nanomaterials (Basel)*, 2020, **10**, 664.
8. H. Zhuo, Y. Hu, Z. Chen, X. Peng, L. Liu, Q. Luo, J. Yi, C. Liu and L. Zhong, *Journal of Materials Chemistry A*, 2019, **7**, 8092-8100.
9. M. Li, S. Chen, B. Fan, B. Wu and X. Guo, *Advanced Functional Materials*, 2020, **30**, 2003214.
10. Y. Yin, Y. Wang, H. Li, J. Xu, C. Zhang, X. Li, J. Cao, H. Feng and G. Zhu, *Chemical Engineering Journal*, 2021, 133158.
